# Supplementary material for: Activation of the sol–gel process by visible light-emitting diodes (LEDs) for the synthesis of inorganic films
Source: Royal Society of Chemistry journal article supplement (doi:10.1039/c5nj00559k), 2015-01-01
Supplement: c5nj00559k1.pdf [file c5nj00559k1.pdf]

*New Journal of Chemistry*

*Supporting Information*

## **Sol-Gel Process Activated by Visible Light-Emitting Diodes (LEDs) for Synthesis of Inorganic Films**

**Suqing Shi,<sup>a,b</sup> Xavier Allonas,<sup>a</sup> Céline Croutxé-Barghorn<sup>\*a</sup> and Abraham Chemtob<sup>a</sup>**

<sup>a</sup>Laboratory of Macromolecular Photochemistry and Engineering, University of Haute-Alsace, 3 rue Alfred Werner, 68093 Mulhouse Cedex, France. Fax: +33(0)389335014; Tel: +33(0)389335017; Email: [celine.croutxe-barghorn@uha.fr](mailto:celine.croutxe-barghorn@uha.fr) (C. Croutxé-barghorn)

<sup>b</sup>Key Laboratory of Synthetic and Natural Functional Molecule Chemistry of Ministry of Education and College of Chemistry & Material Science, Northwest University, Xuefu Ave., Guodu, Chang'an District, Xi'an 710127, PR. China. Fax: +86(0) 29 81535026; Tel: +86 29 81535032; Email: [shisq@nwu.edu.cn](mailto:shisq@nwu.edu.cn) (S. Shi)

30/04/2015

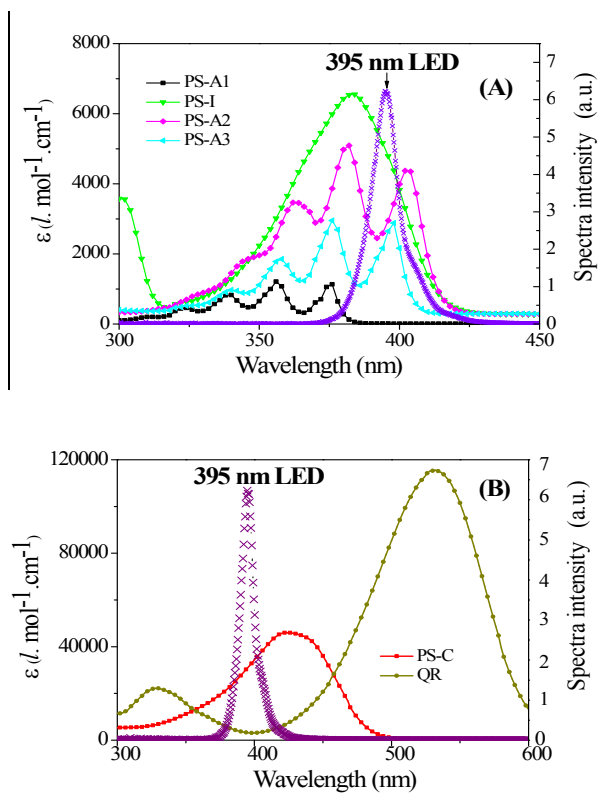

**Fig.S1.** Molar absorption coefficient of the photosensitizers and quinaldine red in methanol and the emission spectrum of 395 nm LED. (A) Absorption of PS-A1-3 and PS-I, (B) Absorption of PS-C and quinaldine red

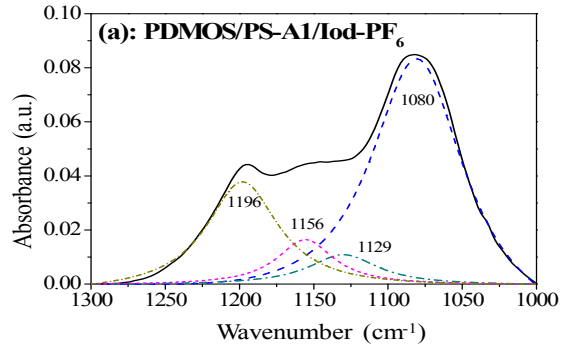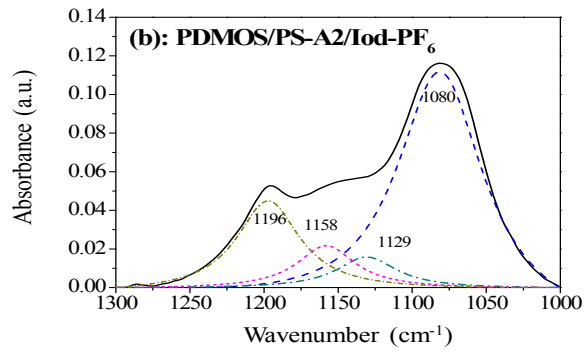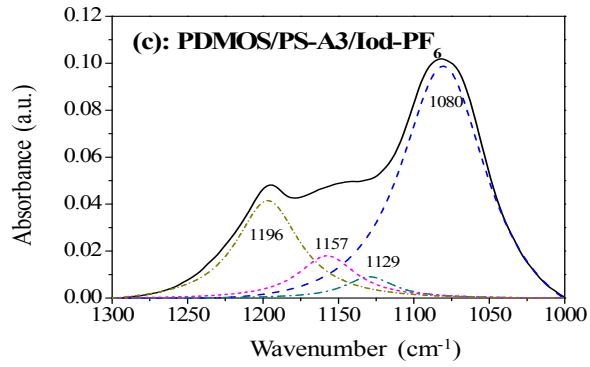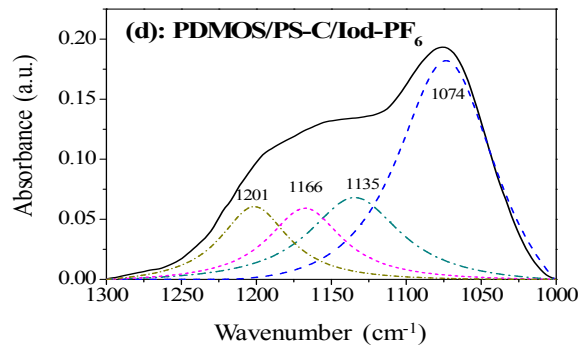

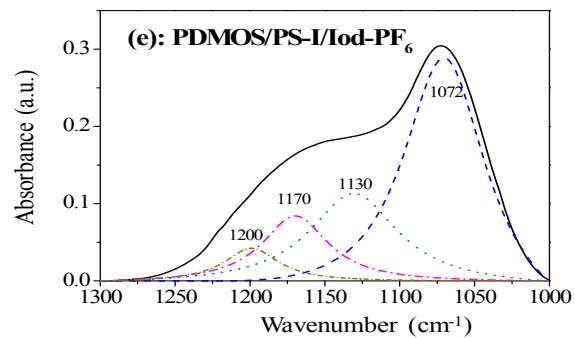

**Fig.S2** Deconvolution of the Si-O-Si stretching band of cured PDMOS films photocatalyzed by PS-A1/Iod-PF<sub>6</sub> (a), PS-A2/Iod-PF<sub>6</sub> (b), PS-A3/Iod-PF<sub>6</sub> (c), PS-C/Iod-PF<sub>6</sub> (d) and PS-I/Iod-PF<sub>6</sub> (e). [PS]=0.4 mol%, [Iod-PF<sub>6</sub>]=0.15 mol%, light intensity =20 mW/cm<sup>2</sup>, irradiation time = 100s.

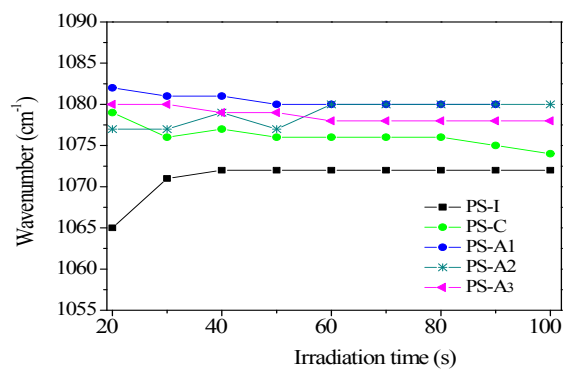

**Fig.S3.** Evolution of the  $\nu_{as}(\text{Si-O-Si})$  vibrational frequencies at  $\sim 1070\text{-}1080\text{ cm}^{-1}$  of PDMOS as a function of irradiation.  $[\text{PS}]=0.4\text{ mol}\%$ ,  $[\text{Iod-PF}_6]=0.15\text{ mol}\%$ , light intensity  $=20\text{ mW/cm}^2$ .

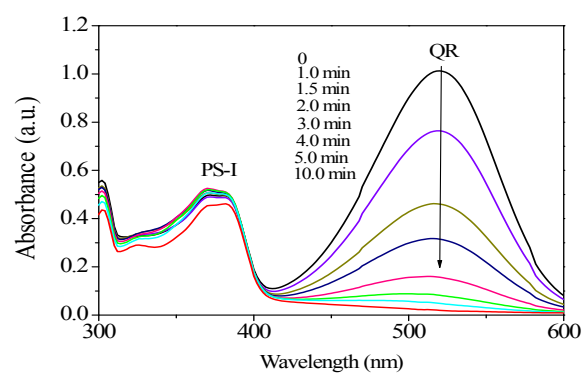

**Fig.S4.** UV spectra changes of 0.06 mM PS-I with 0.03 mM Iod-PF<sub>6</sub> on irradiation from 395 nm LED under air atmosphere in acetonitrile. Light intensity= 40 mW/cm<sup>2</sup>
